# Supplementary material for: Effects of virtual reality training on decreasing the rates of needlestick or sharp injury in new-coming medical and nursing interns in Taiwan
Source: PubMed Central journal article supplement (PMC7054630; doi:10.3352/jeehp.2020.17.1), 2020-01-20
Supplement: jeehp-17-01-suppl2.pdf [file jeehp-17-01-suppl2.pdf]

**Supplement 2.** Comparison of the data of trainees self-assessed questionnaires incorporated in VR systems between groups

|                                                                                                                                                                                                                                                                                                                                                                                                                                           | Nursing interns (n = 59)                                       |                                                    |                                                     | Medical interns (n = 50)                                       |                                                     |                                                      |
|-------------------------------------------------------------------------------------------------------------------------------------------------------------------------------------------------------------------------------------------------------------------------------------------------------------------------------------------------------------------------------------------------------------------------------------------|----------------------------------------------------------------|----------------------------------------------------|-----------------------------------------------------|----------------------------------------------------------------|-----------------------------------------------------|------------------------------------------------------|
|                                                                                                                                                                                                                                                                                                                                                                                                                                           | pre-VR                                                         | post-VR                                            | follow-up                                           | pre-VR                                                         | post-VR                                             | follow-up                                            |
| % of "very familiar" with practicing safe behaviors with UP for NSI/SI prevention                                                                                                                                                                                                                                                                                                                                                         | 17/59 (29%)                                                    | 47/59 (80%)#<br>↑ 176% from pre-VR data            | 40/59 (68%)<br>↑ 134% from pre-VR data              | 9/50<br>-18%                                                   | 41/50 (82%)#<br>↑ 356% from pre-VR data**           | 37/50 (74%)<br>↑ 311% from pre-VR data**             |
| % of trainees agree that they "have confidence" (% of yes) in practicing more than 80% of safe behaviors with UP for NSI/SI prevention                                                                                                                                                                                                                                                                                                    | pre-VR<br>9/59 (15%)                                           | post-VR<br>50/59 (85%)#<br>↑ 467% from pre-VR data | follow-up<br>49/59 (83%)<br>↑ 453% from pre-VR data | pre-VR<br>13/50 (26%)                                          | post-VR<br>43/50 (86%)#<br>↑ 231% from pre-VR data* | follow-up<br>45/50 (90%)<br>↑ 246% from pre-VR data* |
| % of trainees agree that VR training is "useful" (% of yes) than regular model                                                                                                                                                                                                                                                                                                                                                            | post-VR twice practice: 51/59 (86%)                            |                                                    |                                                     | post-VR twice practice: 36/50 (72%)                            |                                                     |                                                      |
| Summative % of trainees reported that VR training "significantly and moderately decrease their anxiety"                                                                                                                                                                                                                                                                                                                                   | post-VR twice practice: 40/59 (68%)                            |                                                    |                                                     | post-VR twice practice: 28/50 (58%)                            |                                                     |                                                      |
| 2-months follow-up % of "have more than one NSI/SI"                                                                                                                                                                                                                                                                                                                                                                                       | during the first 2 months of independent practice: 18/59 (31%) |                                                    |                                                     | during the first 2 months of independent practice: 17/50 (34%) |                                                     |                                                      |
| *p < 0.05 vs. nursing interns; #p < 0.05 vs. pre-VR data; [1 = "not very familiar"; 2 = average; 3 = very familiar; 1 = familiar with < 30%, 2 = 30-70%, 3 = > 70%] of safe behaviors for NSI/SI prevention; trainees self-assessed degree of VR practice on decreasing their anxiety on practicing UP for NSI/SI prevention is divided into significantly decrease (4), moderately decrease (3), mild decrease (2) and not decrease (1). |                                                                |                                                    |                                                     |                                                                |                                                     |                                                      |
